# Supplementary material for: Molecular structure and gas-phase reactivity of zileuton and its N-dehydroxylated metabolite: two-layered ONIOM calculations
Source: Royal Society of Chemistry journal article supplement (doi:10.1039/b001064m), 2000-01-01
Supplement: tables.doc [file tables.doc]

Table A: ONIOM energies (hartrees / molecule) of R(+) zileuton and *N*–dehydroxyzileuton species studied

| Species | EONIOM(Extr) |  |  |  |
| --- | --- | --- | --- | --- |
| **I** | –300.470 057 |  |  |  |
| **II** | –300.463 713 |  |  |  |
| **III** | –300.463 713 |  |  |  |
| **IV** | –299.904 712 |  |  |  |
| **V** | –299.883 823 |  |  |  |
| **VI** | –300.801 165 |  |  |  |
| **VII** | –300.818 420 |  |  |  |
| **MI** | –225.290 849 |  |  |  |
| **MII** | –225.289 603 |  |  |  |
| **MIII** | –224.754 387 |  |  |  |
| **MIV** | –224.707 261 |  |  |  |
| **MV** | –225.643 152 |  |  |  |
| **NVI** | –225.622 768 |  |  |  |

**Table B: Optimized geometries of the R(+) zileuton and R(+) *N*–dehydroxyzileuton species (Fig. 1)**

| Parametera  Structure | | | | | | |
| --- | --- | --- | --- | --- | --- | --- |
|  | **I** | **III** | **IV** | **V** | **VI** | **VII** |
| *d*(N1C2) | 1.372 | 1.381 | 1.390 | 1.300 | 1.582 | 1.318 |
| *d*(N1H8) | 1.007 | 1.010 | 1.008 | 1.016 | 1.024 | 1.010 |
| *d*(N1H9) | 1.008 | 1.009 | 1.022 |  | 1.024 | 1.010 |
| *d*(X...H) |  |  |  |  | 1.024 | 0.967 |
| *d*(C2O3) | 1.217 | 1.228 | 1.246 | 1.242 | 1.186 | 1.315 |
| *d*(C2N4) | 1.411 | 1.384 | 1.374 | 1.557 | 1.346 | 1.343 |
| *d*(N4O5)(H5) | 1.424 | 1.417 | 1.399 | 1.459 | 1.403 | 1.398 |
| *d*(N4C7)(H7) | 1.496 | 1.486 | 1.473 | 1.481 | 1.532 | 1.529 |
| *d*(O5H6) | 0.967 | 0.980 |  | 0.963 | 0.971 | 0.972 |
| *d*(C7H10) | 1.124 | 1.125 | 1.125 | 1.124 | 1.123 | 1.124 |
| *d*(C7C11) | 1.548 | 1.550 | 1.549 | 1.548 | 1.546 | 1.549 |
| *d*(C7C15) | 1.513 | 1.515 | 1.524 | 1.522 | 1.499 | 1.503 |
| *d*(c15s16) | 1.697 | 1.694 | 1.693 | 1.699 | 1.698 | 1.696 |
| *d*(C15C19) | 1.376 | 1.378 | 1.378 | 1.376 | 1.380 | 1.380 |
| *d*(S16C17) | 1.681 | 1.681 | 1.680 | 1.680 | 1.683 | 1.682 |
| *d*(C17C18) | 1.431 | 1.432 | 1.433 | 1.433 | 1.433 | 1.434 |
| *d*(C17C20) | 1.408 | 1.410 | 1.410 | 1.408 | 1.406 | 1.406 |
| *d*(C18C19) | 1.459 | 1.457 | 1.455 | 1.458 | 1.457 | 1.456 |
| *d*(C20C21) | 1.400 | 1.399 | 1.398 | 1.399 | 1.403 | 1.403 |
| *d*(C21C22) | 1.416 | 1.417 | 1.417 | 1.415 | 1.416 | 1.416 |
| *d*(C22C23) | 1.400 | 1.399 | 1.398 | 1.399 | 1.401 | 1.401 |
| *Θ*(C2N1H8) | 114.3 | 111.9 | 113.6 | 109.4 | 105.8 | 118.9 |
| *Θ*(C2N1H9) | 119.3 | 118.7 | 110.2 |  | 113.0 | 120.5 |
| *Θ*(C2N1H29) |  |  |  |  | 108.2 |  |
| *Θ*(N1C2O3) | 123.5 | 122.6 | 122.3 | 131.1 | 116.1 | 115.1 |
| *Θ*(N1C2N4) | 114.0 | 118.2 | 110.9 | 117.1 | 110.9 | 121.1 |
| *Θ*(O3C2N4) | 122.3 | 119.2 | 126.8 | 111.7 | 133.0 | 123.8 |
| *Θ*(C2N4O5) | 114.7 | 112.3 | 119.2 | 114.1 | 115.7 | 112.1 |
| *Θ*(C2N4C7) | 123.1 | 129.9 | 122.4 | 120.2 | 123.0 | 127.2 |
| *Θ*(N4O5H6) | 104.7 | 100.5 |  | 102.1 | 107.2 | 106.6 |
| *Θ* (N4C7H10) | 106.5 | 106.9 | 109.0 | 106.9 | 104.8 | 105.2 |
| *Θ* (N4C7C11) | 113.8 | 114.5 | 112.8 | 116.1 | 112.4 | 113.2 |
| *Θ* (N4C7C15) | 108.9 | 109.8 | 111.6 | 109.0 | 108.3 | 108.7 |
| *Θ*(C15S16C17) | 94.7 | 94.6 | 94.7 | 94.9 | 94.7 | 94.7 |
| *Θ* (C15C19C18) | 112.5 | 112.4 | 112.7 | 112.8 | 112.4 | 112.4 |
| *Θ* (S16C17C18) | 110.9 | 111.0 | 111.0 | 110.7 | 110.8 | 110.8 |
| *Θ* (C17C20C21) | 118.8 | 118.8 | 119.1 | 118.9 | 118.6 | 118.6 |
| *Θ* (C20C21C22) | 120.8 | 120.8 | 120.7 | 120.7 | 120.9 | 120.9 |
| *Θ* (C21C22C23) | 120.8 | 120.8 | 120.8 | 120.9 | 120.9 | 120.9 |
| *Φ*(H8N1C2O3) | 12.3 | 8.1 | 29.3 | 176.0 | 23.8 | -4.6 |
| *Φ*(H9N1C2O3) | 160.6 | 144.2 | 166.8 |  | 145.7 | 170.7 |
| *Φ*(N1C2N4O5) | 10.4 | 176.6 | 2.4 | 5.9 | 1.1 | -1.9 |
| *Φ*(N1C2N4C7) | 161.2 | -20.8 | -173.2 | 142.1 | 173.3 | 162.2 |
| *Φ*(C2N4O5H6) | -106.3 | 9.0 |  | -99.9 | -115.4 | -109.3 |
| *Φ* (C2N4C7H10) | 28.3 | -16.3 | -24.4 | 38.2 | -26.6 | -30.7 |
| *Φ* (C2N4C7C11) | -88.0 | -132.1 | -140.4 | -78.7 | -141.3 | -145.8 |
| *Φ* (C2N4C7C15) | 142.6 | 100.6 | 93.0 | 151.2 | 90.3 | 87.1 |
| *Φ* (N4C7C15S16) | 96.0 | 51.3 | 58.9 | 100.5 | 70.0 | 50.4 |
| *Φ* (N4C7C15C19) | -84.7 | -130.0 | -121.2 | -79.3 | -112.2 | -134.0 |
| (N4C2O3H) |  |  |  |  |  | -22.2 |
| *d*(O3…H6) |  | 1.874 |  |  |  |  |
| *d*(O5...H9) | 2.170 |  | 1.956 | 2.130 | 2.168 |  |

aBond lengths in Å, bond angles and dihedral angles in deg

**Table B: - Continued**

| Parametera | Structure | | | | | |
| --- | --- | --- | --- | --- | --- | --- |
| **MI** | **MII** | **MIII** | **MIV** | **MV** | **MVI** |
| *d*(N1C2) | 1.391 | 1.383 | 1.438 | 1.320 | 1.327 | 1.639 |
| *d*(N1H8) | 1.009 | 1.008 | 1.011 | 1.019 | 1.010 | 1.024 |
| *d*(N1H9) | 1.009 | 1.008 | 1.011 | – | 1.008 | 1.024 |
| *d*(X...H) |  |  |  |  | 0.967 | 1.024 |
| *d*(C2O3) | 1.215 | 1.219 | 1.251 | 1.256 | 1.312 | 1.179 |
| *d*(C2N4) | 1.396 | 1.396 | 1.344 | 1.473 | 1.333 | 1.334 |
| *d*(N4O5)(H5) | 1.014 | 1.014 | – | 1.014 | 1.017 | 1.014 |
| *d*(N4C7)(H7) | 1.476 | 1.471 | 1.447 | 1.452 | 1.506 | 1.511 |
| *d*(O5H6) |  | - | – | – | – | – |
| *d*(C7H10) | 1.123 | 1.123 | 1.126 | 1.123 | 1.123 | 1.122 |
| *d*(C7C11) | 1.549 | 1.550 | 1.553 | 1.551 | 1.549 | 1.547 |
| *d*(C7C15) | 1.515 | 1.516 | 1.525 | 1.527 | 1.503 | 1.502 |
| *d*(c15s16) | 1.698 | 1.695 | 1.694 | 1.699 | 1.697 | 1.698 |
| *d*(C15C19) | 1.374 | 1.375 | 1.379 | 1.374 | 1.379 | 1.378 |
| *d*(S16C17) | 1.682 | 1.681 | 1.681 | 1.680 | 1.682 | 1.683 |
| *d*(C17C18) | 1.432 | 1.432 | 1.434 | 1.433 | 1.434 | 1.432 |
| *d*(C17C20) | 1.408 | 1.409 | 1.409 | 1.408 | 1.406 | 1.406 |
| *d*(C18C19) | 1.460 | 1.459 | 1.454 | 1.459 | 1.456 | 1.458 |
| *d*(C20C21) | 1.401 | 1.400 | 1.399 | 1.400 | 1.403 | 1.403 |
| *d*(C21C22) | 1.415 | 1.416 | 1.416 | 1.415 | 1.416 | 1.415 |
| *d*(C22C23) | 1.400 | 1.399 | 1.398 | 1.399 | 1.401 | 1.402 |
| *Θ*(C2N1H8) | 113.1 | 112.6 | 111.1 | 106.3 | 118.8 | 104.7 |
| *Θ*(C2N1H9) | 119.1 | 120.3 | 111.9 | – | 122.8 | 113.7 |
| *Θ*(C2N1H29) |  |  |  |  | 115.3 | 112.4 |
| *Θ*(N1C2O3) | 122.0 | 121.8 | 115.9 | 131.3 | 113.6 | 114.1 |
| *Θ*(N1C2N4) | 112.5 | 118.1 | 111.7 | 110.7 | 121.3 | 109.5 |
| *Θ*(O3C2N4) | 125.4 | 120.1 | 132.4 | 118.0 | 125.1 | 136.3 |
| *Θ*(C2N4O5)(H5) | 115.2 | 109.4 | – | 110.6 | 114.0 | 117.9 |
| *Θ*(C2N4C7) | 124.6 | 132.0 | 121.2 | 125.7 | 129.9 |  |
| *Θ*(N4O5H6) |  |  | – | – | – | – |
| *Θ* (N4C7H10) | 108.0 | 108.5 | 114.3 | 108.8 | 106.6 |  |
| *Θ* (N4C7C11) | 110.0 | 110.6 | 112.7 | 110.9 | 109.2 | 109.1 |
| *Θ* (N4C7C15) | 111.5 | 111.2 | 107.2 | 112.6 | 110.4 | 114.4 |
| *Θ* (C15S16C17) | 94.7 | 94.6 | 94.7 | 94.9 | 94.6 | 94.6 |
| *Θ* (C15C19C18) | 112.5 | 112.5 | 112.7 | 112.7 | 112.4 | 112.4 |
| *Θ* (S16C17C18) | 110.8 | 110.9 | 111.0 | 110.7 | 110.8 | 110.0 |
| *Θ* (C17C20C21) | 118.7 | 118.8 | 119.1 | 118.9 | 118.6 | 118.6 |
| *Θ* (C20C21C22) | 120.8 | 120.8 | 120.7 | 120.7 | 120.9 | 120.9 |
| *Θ* (C21C22C23) | 120.9 | 120.9 | 120.8 | 120.9 | 120.9 | 120.9 |
| *Φ*(H8N1C2O3) | 11.4 | 11.1 | 30.3 | 1.4 | –5.6 | 4.7 |
| *Φ*(H9N1C2O3) | 150.6 | 151.3 | 158.9 | – | 171.1 | 123.0 |
| *Φ*(N1C2N4O5) | -15.1 | 176.6 | – | –7.8 | –10.4 | –5.7 |
| *Φ*(N1C2N4C7) | -175.5 | -6.9 | –175.4 | –163.2 | 173.5 | –174.2 |
| *Φ*(C2N4O5H6) | - | - | – | – | – | – |
| *Φ* (C2N4C7H10) | -31.8 | -30.8 | 28.4 | –31.7 | –41.7 | –38.7 |
| *Φ* (C2N4C7C11) | -147.0 | -146.8 | –92.6 | –147.3 | –156.8 | –154.0 |
| *Φ* (C2N4C7C15) | 86.8 | 88.1 | 145.7 | 86.5 | 77.8 | 79.9 |
| *Φ* (N4C7C15S16) | 63.7 | 45.9 | 38.0 | 71.1 | 46.3 | 56.8 |
| *Φ* (N4C7C15C19) | -116.1 | -135.3 | –141.7 | –107.4 | –137.7 | –125.2 |
| (N4C2O3H) |  |  |  | – |  |  |
| *d*(O3…H6) |  |  |  |  |  |  |
| *d*(O5...H9) |  |  |  |  |  |  |

aBond lengths in Å, bond angles and dihedral angles in deg
